# Supplementary figures and images for: RETRACTED ARTICLE: Dapagliflozin Guards Against Cadmium-Induced Cardiotoxicity via Modulation of IL6/STAT3 and TLR2/TNFα Signaling Pathways
Source: Springer Nature journal article supplement (doi:10.1007/s12012-022-09768-0), 2022-10-15

## p-STAT3

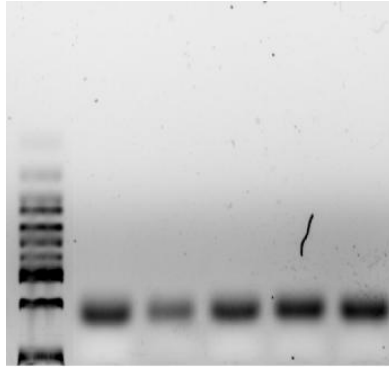

p -STAT3  83 KDs

## STAT3

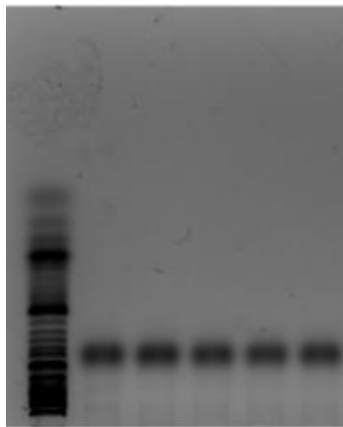

STAT3  83 KDs

# TNF alpha

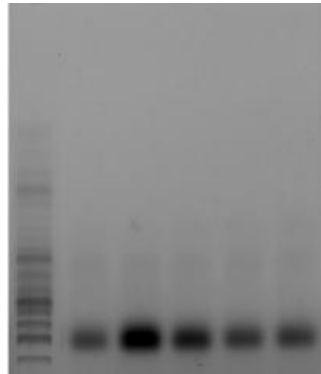

TNF-alpha

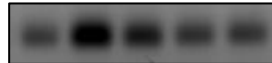

17 KDs

# NF-KB

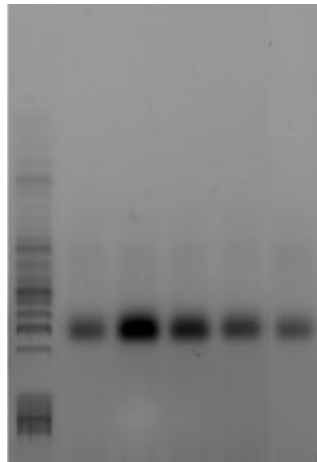

NK-KB

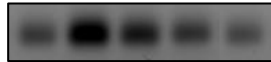

77 KDa

# GPx

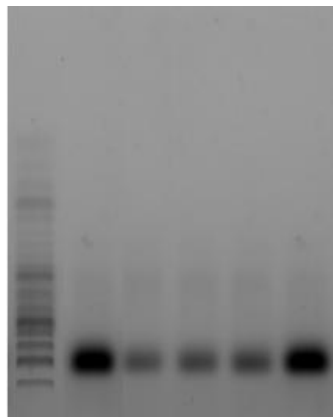

GPx

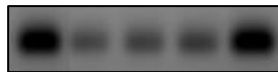

22 KDs

# GAPDH

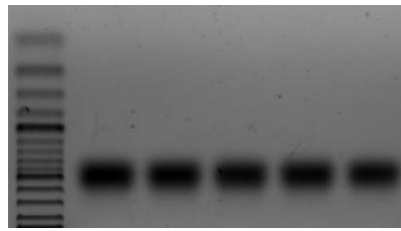

GAPDH

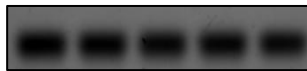

37 KDs

Supplement: MOESM1 [file 23607656]
